# Supplementary material for: Classification, Naming and Evolutionary History of Glycosyltransferases from Sequenced Green and Red Algal Genomes
Source: PLoS One. 2013 Oct 16;8(10):e76511. doi: 10.1371/journal.pone.0076511 (PMC3797821; doi:10.1371/journal.pone.0076511)
Supplement: Table S1 — Overview of the genes found the analyzed genomes. For C. reinhardtii and V. carteri f. nagariensis the JGI protein ID is given as reference. For O. tauri, O. lucimarinus and Micromonas sp. the genbank accesion used as reference in CAZy is provided as reference. For C. merolae and G. sulphuraria the reference given is to the used public databases described in materials and methods. Genes that are not named are not included in the phylogenetic trees due to obvious and large mistakes, be it annotation mistakes or pseudogenes. (XLSX) [file pone.0076511.s019.xlsx]

## Sheet: GT01
Protein ID or Accession number	Species name	GT name
Cr-142823	Chlamydomonas reindhardtii
Cr-154976	Chlamydomonas reindhardtii
Vc-107294	Volvox carteri f. nagariensis
Vc-80368	Volvox carteri f. nagariensis
Vc-98502	Volvox carteri f. nagariensis

## Sheet: GT02
Protein ID or Accession number	Species name	GT name
Ch-138210	Chlamydomonas reindhardtii	CrDPM1
Ch-18353	Chlamydomonas reindhardtii	CrALG5
Ch-299993	Chlamydomonas reindhardtii	CrGT2B1
Ch-397637	Chlamydomonas reindhardtii	CrGT2B2
Ch-401438	Chlamydomonas reindhardtii	CrCslK
Cm-CME113C	Cyanidioschyzon merolae	CmGT2D1
Cm-CMK197C	Cyanidioschyzon merolae	CmALG5
Cm-CMO241C	Cyanidioschyzon merolae	CmGT2B1
Cm-CMQ442C	Cyanidioschyzon merolae	CmGT2C1
Cm-CMS169C	Cyanidioschyzon merolae	CmDPM1
Gs00610	Galdieria suplhuraria	GsGT2D1
Gs03770	Galdieria suplhuraria	GsALG5
Gs08970	Galdieria suplhuraria	GsGT2B1
Gs20330	Galdieria suplhuraria	GsDPM1
Gs48870	Galdieria suplhuraria	GsGT2C1
ACO60852	Micromonas sp. RCC299	MiDPM1
ACO62194	Micromonas sp. RCC299	MiGT2B1
ACO68492	Micromonas sp. RCC299	MiGT2B2
ACO69823	Micromonas sp. RCC299	MiCslK
ABO94650	Ostreococcus lucimarinus	OlGT2B2
ABO97327	Ostreococcus lucimarinus	OlDPM1
ABO98504	Ostreococcus lucimarinus	OlGT2B1
ABP00144	Ostreococcus lucimarinus	OlCslK
CAL52444	Ostreococcus tauri	OtGT2B3
CAL52809	Ostreococcus tauri	OtGT2B2
CAL54719	Ostreococcus tauri	OtDPM1
CAL56290	Ostreococcus tauri	OtGT2B1
CAL57811	Ostreococcus tauri	OtCslK
Vc-101543	Volvox carteri f. nagariensis
Vc-84369	Volvox carteri f. nagariensis
Vx-115867	Volvox carteri f. nagariensis	VcCslK
Vx-80923	Volvox carteri f. nagariensis	VcDPM1
Vx-92792	Volvox carteri f. nagariensis	VcAlg5

## Sheet: GT04
Protein ID or Accession number	Species name	GT name
Ch-116277	Chlamydomonas reindhardtii	CrSQD21
Ch-121326	Chlamydomonas reindhardtii	CrSQD22
ch-122195	Chlamydomonas reindhardtii	CrALG2
Ch-139676	Chlamydomonas reindhardtii	CrPIGA
ch-149711	Chlamydomonas reindhardtii	CrGT4A2
Ch-196553	Chlamydomonas reindhardtii	CrDGD
ch-19999	Chlamydomonas reindhardtii	CrALG11
Ch-291213	Chlamydomonas reindhardtii	CrGT4A1
Cr-176209	Chlamydomonas reindhardtii
Cm-CMR015C	Cyanidioschyzon merolae	CmSQD2
Cm-CMT168C	Cyanidioschyzon merolae	CmALG2
Ga-Gs-12800	Galdieria suplhuraria
Ga-Gs-31710	Galdieria suplhuraria
Ga-Gs-35450	Galdieria suplhuraria
Ga-Gs-54900	Galdieria suplhuraria
Ga-Gs-55570	Galdieria suplhuraria
Gs23580	Galdieria suplhuraria	GsSQD22
Gs35100	Galdieria suplhuraria	GsSQD21
Gs42280	Galdieria suplhuraria	GsALG11
Gs57500	Galdieria suplhuraria	GsALG2
ACO60746	Micromonas sp. RCC299	MiPIGA
ACO60812	Micromonas sp. RCC299	MiGT4A1
ACO63185	Micromonas sp. RCC299	MiSQD21
ACO63900	Micromonas sp. RCC299	MiGT4A2
ACO64872	Micromonas sp. RCC299	MiDGD1
ACO67228	Micromonas sp. RCC299	MiALG11
ACO68735	Micromonas sp. RCC299	MiALG2
ACO70473	Micromonas sp. RCC299	MiDGD2
ABO94695	Ostreococcus lucimarinus	OlALG2
ABO95353	Ostreococcus lucimarinus	OlPIGA
ABO97975	Ostreococcus lucimarinus	OlALG11
ABO98758	Ostreococcus lucimarinus	OlDGD
CAL52097	Ostreococcus tauri	OtALG2
CAL53124	Ostreococcus tauri	OtPIGA
CAL54570	Ostreococcus tauri	OtDGD1
CAL55753	Ostreococcus tauri	OtDGD2
CAL57531	Ostreococcus tauri	OtSQD21
CAL57880	Ostreococcus tauri	OtGT4A1
Vx-103930	Volvox carteri f. nagariensis	VcALG11
Vx-116955	Volvox carteri f. nagariensis	VcDGD
Vx-57787	Volvox carteri f. nagariensis
Vx-67522	Volvox carteri f. nagariensis	VcALG2
Vx-82536	Volvox carteri f. nagariensis	VcSQD2
Vx-87288	Volvox carteri f. nagariensis	VcGT4A3
Vx-87378	Volvox carteri f. nagariensis	VcGT4A1
Vx-87398	Volvox carteri f. nagariensis	VcGT4A2
Vx-94566	Volvox carteri f. nagariensis	VcPIGA

## Sheet: GT05
Protein ID or Accession number	Species name	GT name
Ch-120082	Chlamydomonas reindhardtii	CrSS1
Ch-153781	Chlamydomonas reindhardtii	CrSS2
Ch-183277	Chlamydomonas reindhardtii	CrSS3
Ch-185710	Chlamydomonas reindhardtii	CrSS4
Ch-191662	Chlamydomonas reindhardtii	CrSS5
Ch-205619	Chlamydomonas reindhardtii	CrGBSS1
Ch-286355	Chlamydomonas reindhardtii	CrSS6
Ch-503	Chlamydomonas reindhardtii	CrGBSS2
Cm-CMM317C	Cyanidioschyzon merolae	CmSS
Gs14030	Galdieria suplhuraria	GsSS
ACO61547	Micromonas sp. RCC299	MiGBSS
ACO61951	Micromonas sp. RCC299	MiSS1
ACO64201	Micromonas sp. RCC299	MiSS2
ACO64202	Micromonas sp. RCC299	MiSS3
ACO65202	Micromonas sp. RCC299	MiSS4
ACO66452	Micromonas sp. RCC299	MiSS5
ACO67718	Micromonas sp. RCC299	MiSS6
ACO67781	Micromonas sp. RCC299	MiSS7
ACO69343	Micromonas sp. RCC299	MiSS8
ABO94079	Ostreococcus lucimarinus	OlSS1
ABO96549	Ostreococcus lucimarinus	OlGBSS
ABO96557	Ostreococcus lucimarinus	OlSS2
ABO99223	Ostreococcus lucimarinus	OlSS3
ABO99224	Ostreococcus lucimarinus	OlSS4
ABP00035	Ostreococcus lucimarinus	OlSS5
AS88880	Ostreococcus tauri	OtSS1
AS88881	Ostreococcus tauri	OtSS2
AS88890	Ostreococcus tauri	OtGBSS
AS88892	Ostreococcus tauri	OtSS3
AS88893	Ostreococcus tauri	OtSS4
Vx-103172	Volvox carteri f. nagariensis	VcSS1
Vx-106932	Volvox carteri f. nagariensis	VcSS2
Vx-108446	Volvox carteri f. nagariensis	VcSS3
Vx-58732	Volvox carteri f. nagariensis	VcSS4
Vx-72820	Volvox carteri f. nagariensis	VcGBSS
Vx-99305	Volvox carteri f. nagariensis	VcSS5
Vx-99865	Volvox carteri f. nagariensis	VcSS6
Vc-98674	Volvox carteri f. nagariensis

## Sheet: GT08
Protein ID or Accession number	Species name	GT name
Ch-422076	Chlamydomonas reindhardtii	CrGT8A1
Cm-CMG174C	Cyanidioschyzon merolae
Cm-CMK020C	Cyanidioschyzon merolae	CmGT8A1
Gs08790	Galdieria suplhuraria
Gs12000	Galdieria suplhuraria	GsGT8A1
Vx-106550	Volvox carteri f. nagariensis	VcGT8A1

## Sheet: GT10
Protein ID or Accession number	Species name	GT name
Ch-191875	Chlamydomonas reindhardtii	CrFUCTC
Vx-103312	Volvox carteri f. nagariensis	VcFUCTC

## Sheet: GT14
Protein ID or Accession number	Species name	GT name
Ga29830	Galdieria suplhuraria
Ga48630	Galdieria suplhuraria
Gs53640	Galdieria suplhuraria

## Sheet: GT19
Protein ID or Accession number	Species name	GT name
Cm-CMM016C	Cyanidioschyzon merolae	CmGT19A1
Cm-CMG211C	Cyanidioschyzon merolae	CmGT19A2
Gs47910.1	Galdieria suplhuraria	GsGT19A1
Gs47910.2	Galdieria suplhuraria	GsGT19A1
Gs06440	Galdieria suplhuraria	Gs06440
Gs47780	Galdieria suplhuraria	GsGT19A2

## Sheet: GT20
Protein ID or Accession number	Species name	GT name
Cr-131610	Chlamydomonas reindhardtii
Cr-205538	Chlamydomonas reindhardtii
Cr-288110	Chlamydomonas reindhardtii
Cr-60124	Chlamydomonas reindhardtii
Cm-CMI293C/217-960	Cyanidioschyzon merolae	CmTPS1
Cm-CMO053C/345-1058	Cyanidioschyzon merolae	CmTPS2
Cm-CMP219C/155-867	Cyanidioschyzon merolae	CmTPS3
Cm-CMS178C/109-825	Cyanidioschyzon merolae	CmTPS4
Gs10960.2/181-923	Galdieria suplhuraria	GsTPS1
Gs10960/181-923	Galdieria suplhuraria	GsTPS2
Gs22110/69-750	Galdieria suplhuraria	GsTPS3
Gs26940/93-788	Galdieria suplhuraria	GsTPS4
ACO65291	Micromonas sp. RCC299	MiTPS2
ACO68764	Micromonas sp. RCC299	MiTPS1
ABO99128	Ostreococcus lucimarinus	OlTPS2
CAL50152	Ostreococcus tauri	OtTPS1
CAL57334	Ostreococcus tauri	OtTPS3
Vx-54993/8-755	Volvox carteri f. nagariensis	VcTPS1
Vc-63119	Volvox carteri f. nagariensis

## Sheet: GT21
Protein ID or Accession number	Species name	GT name
Cr-34629	Chlamydomonas reindhardtii
ACO70584	Micromonas sp. RCC299	MiGT21A1
Vx-119967	Volvox carteri f. nagariensis	VcGT21A1

[truncated: 20 more sheets: GT22, GT24, GT28, GT32, GT33, GT34, GT35, GT39, GT41, GT47, GT48, GT49, GT50, GT57, GT58, GT64, GT66, GT71, GT75, GT77]
